# Supplementary material for: Non-invasive nanoscale imaging of protein micro- and nanocrystals for screening crystallization conditions
Source: PubMed Central journal article supplement (PMC11611282; doi:10.1107/s1600576724010124), 2024-11-22
Supplement: j-57-01907-sup1.pdf [file j-57-01907-sup1.pdf]

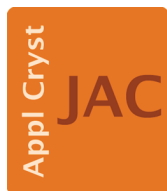

JOURNAL OF  
APPLIED  
CRYSTALLOGRAPHY

**Volume 57 (2024)**

**Supporting information for article:**

**Non-invasive nanoscale imaging of protein micro- and nano-crystals  
for screening crystallization conditions**

**Krishna Prasad Khakurel, Kei Hosomi, Wataru Inami and Kawata Yoshimasa**

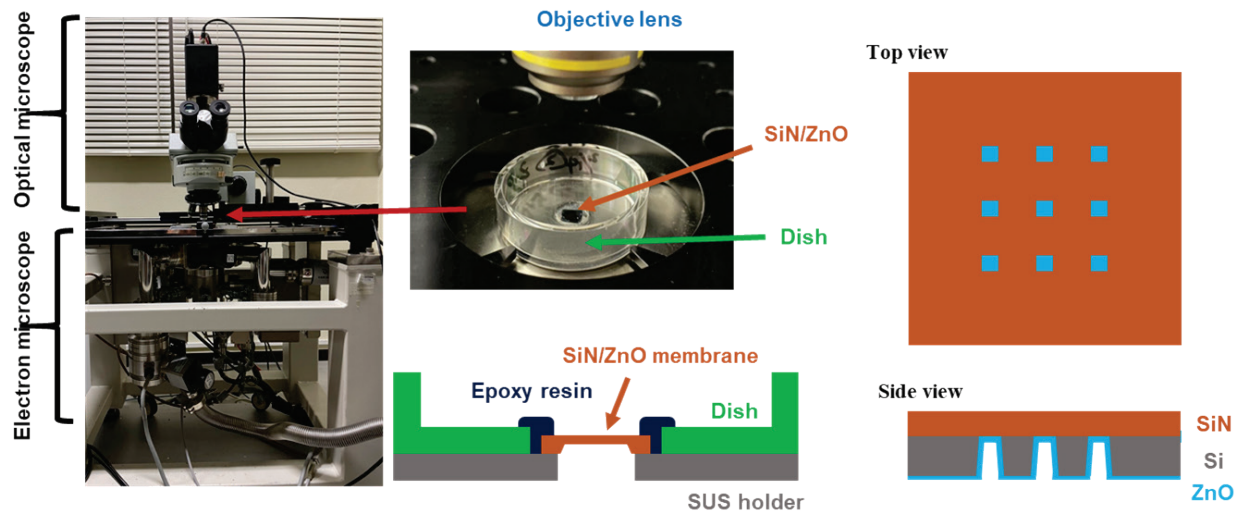

**Figure S1** The photograph of the EXA-CL microscope and the pipeline of protocol of imaging of the micro/nanocrystals of proteins.

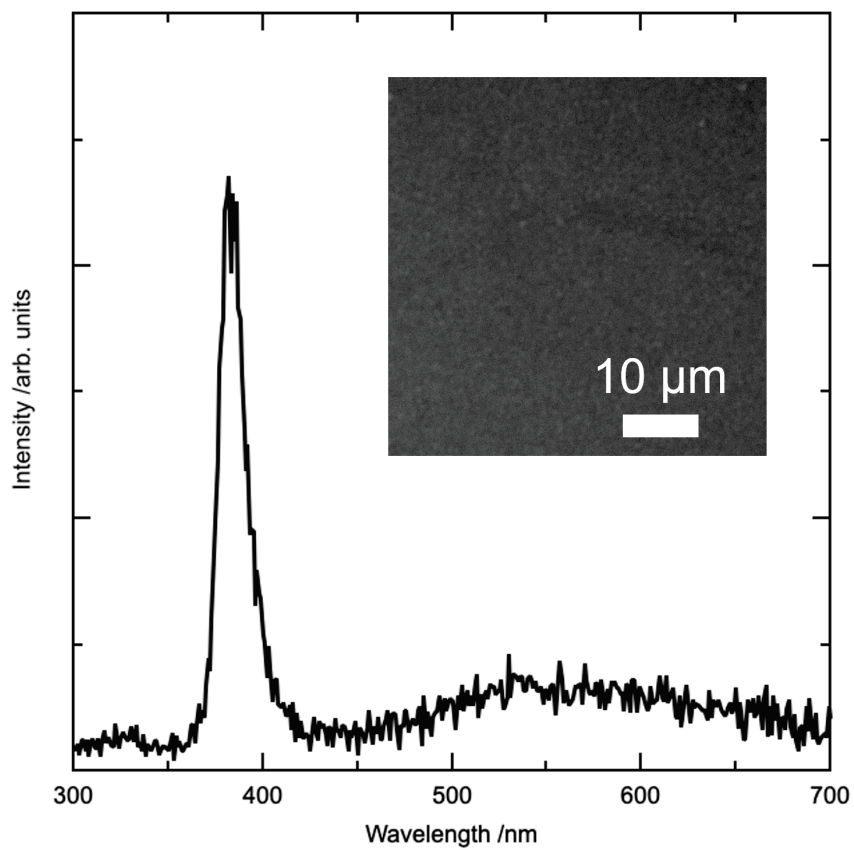

**Figure S2** A typical cathodoluminescence spectra of ZnO. The inset shows the SEM image of the ZnO thin film.
